# Supplementary material for: Brain Microbiota in Huntington’s Disease Patients
Source: PubMed Central journal article supplement (PMC6861841; doi:10.3389/fmicb.2019.02622), 2019-11-12
Supplement: Data_Sheet_2.pdf [file Data_Sheet_2.pdf]

## BRAIN MICROBIOTA IN HUNTINGTON'S DISEASE PATIENTS

Ruth Alonso, Diana Pisa, and Luis Carrasco\*

Centro de Biología Molecular “Severo Ochoa” (CSIC-UAM). c/Nicolás Cabrera, 1. Universidad Autónoma de Madrid. Cantoblanco. 28049 Madrid. Spain.

<sup>+</sup>RA and DP contributed equally to this work.

\*Corresponding author

Email address: [lcarrasco@cbm.csic.es](mailto:lcarrasco@cbm.csic.es). Telephone number: +34 91 497 84 50

Running title: Huntington's disease and microbial infection

Key words: Huntington's disease; neurodegenerative diseases; polymicrobial infections; endomycosomes; fungal infection; next generation sequencing

**Supplementary Table 1. Age and gender of HD patients.**

| PATIENT | GENDER | AGE | G. VONSATTEL |
|---------|--------|-----|--------------|
| HD1     | M      | 34  | 0-I          |
| HD2     | F      | 53  | II           |
| HD3     | M      | 43  | II           |
| HD4     | M      | 55  | III          |
| HD5     | M      | 68  | III          |
| HD6     | F      | 56  | IV           |
| HD7     | M      | 64  | IV           |



**Supplementary Table 3. Fungal species detected by NGS in ST and FC from seven HD patients.**

| HD1ST                           |       | HD1FC                           |       | HD2 ST                          |      | HD2 FC                          |      | HD3 ST                          |      | HD3 FC                          |      |
|---------------------------------|-------|---------------------------------|-------|---------------------------------|------|---------------------------------|------|---------------------------------|------|---------------------------------|------|
| Number of reads:118143          |       | Number of reads:276036          |       | Number of reads:179862          |      | Number of reads:195990          |      | Number of reads:186643          |      | Number of reads:213301          |      |
| Sequence joined:88,1%           |       | Sequence joined:96,7%           |       | Sequence joined:95,4%           |      | Sequence joined:95,5%           |      | Sequence joined:98,6%           |      | Sequence joined:97,9%           |      |
| unculturedBasidiomycota         | 24,34 | unculturedBasidiomycota         | 15,82 | uncultured Basidiomycota        | 26,4 | uncultured zygomycete           | 22,3 | uncultured Basidiomycota        | 14,6 | Penicillium_aurantiogriseum     | 36,4 |
| candida deformans               | 5,9   | candida deformans               | 6,2   | candida deformans               | 7,7  | Malassezia_sp_HM_2008           | 15,3 | Davidiella_tassiana             | 11,4 | unculturedBasidiomycota         | 7,73 |
| Uncultured Helotiales           | 4,8   | Uncultured Helotiales           | 5,1   | Uncultured Helotiales           | 6,3  | candida deformans               | 6,2  | candida deformans               | 5,1  | Xylaria_curta                   | 4,83 |
| Uncultured fungus clone S24T_41 | 3,9   | Uncultured fungus clone S24T_41 | 4,2   | Uncultured fungus clone S24T_41 | 5,1  | Uncultured Helotiales           | 5,1  | Candida_sp,                     | 4,82 | candida deformans               | 3,9  |
| Uncultured fungus clone CMH602  | 3,2   | Xylaria_curta                   | 3,489 | Uncultured fungus clone CMH602  | 4,1  | Uncultured fungus clone S24T_41 | 4,1  | Uncultured Helotiales           | 4,2  | Uncultured Helotiales           | 3,2  |
| Ramularia glennii               | 1,7   | Uncultured fungus clone CMH602  | 3,3   | Candida_sp,                     | 3,57 | Uncultured fungus clone CMH602  | 3,3  | Rhodotorula_mucilaginoso        | 4,1  | Davidiella_tassiana             | 2,69 |
|                                 |       | Davidiella_tassiana             | 3,274 | Ramularia glennii               | 2,3  | Ramularia glennii               | 1,8  | Pleospora_herbarum              | 3,57 | Uncultured fungus clone S24T_41 | 2,6  |
|                                 |       | Rhodotorula_mucilaginoso        | 3,071 | Xylaria_curta                   | 1,4  |                                 |      | Uncultured fungus clone S24T_41 | 3,4  | Uncultured fungus clone CMH602  | 2,1  |
|                                 |       | Penicillium_aurantiogriseum     | 2,579 |                                 |      |                                 |      | Eremascus_albus                 | 3,33 | unculturedsoil_fungus           | 1,83 |
|                                 |       | Ramularia glennii               | 1,8   |                                 |      |                                 |      | Trichoderma_sp_CHTAM10          | 3,08 | Rhodotorula_mucilaginoso        | 1,8  |
|                                 |       | Malassezia_sp_HM_2008           | 1,717 |                                 |      |                                 |      | Xylaria_curta                   | 2,75 | Fusarium_oxysporum              | 1,32 |
|                                 |       |                                 |       |                                 |      |                                 |      | Uncultured fungus clone CMH602  | 2,7  | Ramularia glennii               | 1,1  |
|                                 |       |                                 |       |                                 |      |                                 |      | Malassezia_sp_HM_2008           | 2,67 |                                 |      |
|                                 |       |                                 |       |                                 |      |                                 |      | Rhizophlyctis_rosea             | 1,76 |                                 |      |
|                                 |       |                                 |       |                                 |      |                                 |      | Ramularia glennii               | 1,5  |                                 |      |
|                                 |       |                                 |       |                                 |      |                                 |      |                                 |      |                                 |      |
| HD4 ST                          |       | HD4 FC                          |       | HD5 ST                          |      | HD5 FC                          |      | HD6 ST                          |      | HD6 FC                          |      |
| Number of reads:194196          |       | Number of reads:243144          |       | Number of reads:208378          |      | Number of reads:206556          |      | Number of reads:156245          |      | Number of reads:184219          |      |
| Sequence joined:98,3%           |       | Sequence joined:98,4%           |       | Sequence joined:98,4%           |      | Sequence joined:97,9%           |      | Sequence joined:97,3%           |      | Sequence joined:98,3%           |      |
| Davidiella_tassiana             | 14,97 | Xylaria_cubensis                | 9,04  | unculturedBasidiomycota         | 18,5 | unculturedendophytic_fungus     | 42   | candida deformans               | 10,9 | unculturedBasidiomycota         | 25,4 |

|                                 |       |                                 |       |                                 |      |                          |      |                                 |     |                                 |      |
|---------------------------------|-------|---------------------------------|-------|---------------------------------|------|--------------------------|------|---------------------------------|-----|---------------------------------|------|
| candida deformans               | 6,2   | candida deformans               | 7,9   | Davidiella_tassiana             | 11,2 | Davidiella_tassiana      | 7,75 | Uncultured Helotiales           | 8,9 | Davidiella_tassiana             | 10,9 |
| unidentified_sp,                | 5,236 | Uncultured Helotiales           | 6,4   | Ustilago_hordei                 | 7,15 | Rhizophydiales_sp_PL163L | 2,22 | Uncultured fungus clone S24T_41 | 7,3 | Tubeufiaceae_sp_MFLUCC10_0115   | 6,65 |
| Uncultured Helotiales           | 5,1   | Uncultured fungus clone S24T_41 | 5,2   | candida deformans               | 6,8  |                          |      | Uncultured fungus clone CMH602  | 5,8 | candida deformans               | 4,9  |
| Uncultured fungus clone S24T_41 | 4,1   | ascomycete_sp_CH_Aa3L           | 4,959 | Uncultured Helotiales           | 5,6  |                          |      | Ramularia glennii               | 3,2 | Uncultured Helotiales           | 4,1  |
| Uncultured fungus clone CMH602  | 3,3   | Uncultured fungus clone CMH602  | 4,2   | Uncultured fungus clone S24T_41 | 4,5  |                          |      |                                 |     | Uncultured fungus clone S24T_41 | 3,3  |
| ascomycete_sp_IBWF79B_90A       | 2,552 | Ramularia glennii               | 2,3   | Uncultured fungus clone CMH602  | 3,6  |                          |      |                                 |     | Uncultured fungus clone CMH602  | 2,7  |
| Cryptococcus_magnus             | 2,463 | unculturedBasidiomycota         | 1,261 | unculturedsoil_fungus           | 2,81 |                          |      |                                 |     | Cladonia_fimbriata              | 2,12 |
| Candida_sp,                     | 2,428 |                                 |       | Ramularia glennii               | 1,9  |                          |      |                                 |     | Ramularia glennii               | 1,5  |
| Malassezia_sp_HM_2008           | 2,375 |                                 |       |                                 |      |                          |      |                                 |     | Dioszegia_crocea                | 1,11 |
| unculturedsoil_fungus           | 2,32  |                                 |       |                                 |      |                          |      |                                 |     |                                 |      |
| Xylaria_curta                   | 2,304 |                                 |       |                                 |      |                          |      |                                 |     |                                 |      |
| Rhodotorula_mucilaginosa        | 2,104 |                                 |       |                                 |      |                          |      |                                 |     |                                 |      |
| unculturedBasidiomycota         | 1,877 |                                 |       |                                 |      |                          |      |                                 |     |                                 |      |
| Ramularia glennii               | 1,8   |                                 |       |                                 |      |                          |      |                                 |     |                                 |      |

|                          |                        |                                 |      |
|--------------------------|------------------------|---------------------------------|------|
| HD7 ST                   | HD7 FC                 |                                 |      |
| Number of reads:194617   | Number of reads:201712 |                                 |      |
| Sequence joined:97,7%    | Sequence joined:97,5%  |                                 |      |
| Davidiella_tassiana      | 69,38                  | candida deformans               | 11,2 |
| Rhodotorula_mucilaginosa | 26,13                  | Uncultured Helotiales           | 9,2  |
|                          |                        | Uncultured fungus clone S24T_41 | 7,5  |
|                          |                        | Uncultured fungus clone CMH602  | 5,9  |
|                          |                        | Ramularia glennii               | 3,3  |

**Supplementary table 4. Bacterial species IGS.**

| Species                         | Patients                                        |
|---------------------------------|-------------------------------------------------|
| <i>Escherichia coli</i>         | HD3(ST);HD4 (FC)                                |
| <i>Fusobacterium nucleatum</i>  | HD2 (FC)                                        |
| <i>Cutibacterium acnes</i>      | HD2( ST,FC); HD4(FC); HD5(FC); HD6(ST); HD7(ST) |
| <i>Staphylococcus aureus</i>    | HD4(ST)                                         |
| <i>Streptococcus pneumoniae</i> | HD7(FC)                                         |
| <i>Streptococcus sp</i>         | HD1(ST)                                         |
| <i>Uncultured bacterium</i>     | HD2(ST)                                         |

**Supplementary table 5. Bacterial species identified by NGS in FC and ST from HD patients.**

| HD1 ST                               | HD1 FC | HD2 ST                            | HD2 FC | HD3 ST                                | HD3 FC |                                       |     |                                 |      |                                       |     |
|--------------------------------------|--------|-----------------------------------|--------|---------------------------------------|--------|---------------------------------------|-----|---------------------------------|------|---------------------------------------|-----|
| <i>Cutibacterium acnes</i>           | 43,59  | <i>Acinetobacter schindleri</i>   | 12,9   | <i>Escherichia coli</i>               | 33     | <i>Acinetobacter lwoffii</i>          | 13  | <i>Escherichia coli</i>         | 24,7 | <i>Acinetobacter schindleri</i>       | 34  |
| <i>Phyllobacterium</i>               | 19,61  | <i>Bacteroides ovatus</i>         | 12,6   | <i>Burkholderia</i>                   | 17,5   | <i>Arthrobacter</i>                   | 12  | <i>Corynebacterium</i>          | 11,6 | <i>Cutibacterium acnes</i>            | 15  |
| <i>Burkholderia</i>                  | 8,716  | <i>Arthrobacter</i>               | 11     | <i>Rothia mucilaginosa</i>            | 12,2   | <i>Corynebacterium Pseudomonas</i>    | 12  | <i>Sphingomonadales</i>         | 11,3 | <i>Betaproteobacteria</i>             | 12  |
| <i>Pseudomonas viridiflava</i>       | 4,517  | <i>Acinetobacter lwoffii</i>      | 9,88   | <i>Microbacterium</i>                 | 8,34   | <i>pseudoalcaligenes</i>              | 6,8 | <i>Blautia</i>                  | 10,9 | <i>Escherichia coli</i>               | 8,9 |
| <i>Corynebacterium</i>               | 3,413  | <i>Escherichia coli</i>           | 8,44   | <i>Rhizobiales</i>                    | 3,89   | <i>Pseudomonas viridiflava</i>        | 6,8 | <i>Anaerococcus</i>             | 7,95 | <i>Moraxella</i>                      | 8,4 |
| <i>Corynebacteriumkroppenstedtii</i> | 2,671  | RB41                              | 7,92   | <i>Phyllobacterium</i>                | 2,67   | <i>Acidobacteria</i>                  | 6,2 | <i>Acinetobacter lwoffii</i>    | 7,73 | <i>Corynebacterium kroppenstedtii</i> | 6,1 |
| <i>Cutibacterium</i>                 | 2,268  | iii1-8                            | 6,03   | <i>Burkholderiaceae</i>               | 2,32   | <i>Actinomycetales</i>                | 4,9 | <i>Sphingobium sp</i>           | 4,24 | <i>Enterobacteriaceae</i>             | 3,4 |
| <i>Burkholderiaceae</i>              | 1,493  | <i>Gemmatimonadetes</i>           | 4,09   | <i>Veillonella dispar</i>             | 2,04   | <i>Cellvibrio</i>                     | 4,7 | <i>Sphingobium xenophagum</i>   | 3,16 |                                       |     |
| <i>Actinomycetales</i>               | 1,146  | <i>Gillisia</i>                   | 3,86   | <i>Ralstonia</i>                      | 1,32   | <i>Roseburia</i>                      | 3,3 | <i>Xanthomonadaceae</i>         | 2,55 |                                       |     |
| <i>Pseudomonas</i>                   | 1,089  | <i>Enterobacter cloacae</i>       | 3,33   | <i>Mycobacterium</i>                  | 1,29   | <i>Pseudomonas</i>                    | 2,6 | <i>Alphaproteobacteria</i>      | 2,3  |                                       |     |
| <i>Cutibacterium granulosum</i>      | 1,082  | <i>Rothia mucilaginosa</i>        | 2,61   | <i>Scardovia</i>                      | 1,26   | <i>Corynebacterium</i>                | 2   | <i>Acinetobacter schindleri</i> | 1,56 |                                       |     |
| <i>Escherichia coli</i>              | 1,019  | <i>Haemophilus parainfluenzae</i> | 2,41   | <i>Streptococcus</i>                  | 1,19   | <i>Acidobacteria-6</i>                | 1,9 | <i>Sphingobium</i>              | 1,17 |                                       |     |
|                                      |        | <i>Enterobacter</i>               | 1,63   | <i>Salinispora</i>                    | 1,15   | <i>Rhodobacter</i>                    | 1,8 | <i>Acinetobacter</i>            | 1,15 |                                       |     |
|                                      |        | <i>Klebsiella</i>                 | 1,29   | <i>Corynebacterium kroppenstedtii</i> | 1,1    | <i>Corynebacterium kroppenstedtii</i> | 1,5 | <i>Phenyllobacterium</i>        | 1,13 |                                       |     |
|                                      |        | <i>Other</i>                      | 1,12   |                                       |        | <i>Sphingomonas</i>                   | 1,5 | <i>Ralstonia</i>                | 1,08 |                                       |     |
|                                      |        | <i>Acinetobacter;Other</i>        | 1,09   |                                       |        | <i>Fusobacterium</i>                  | 1,4 |                                 |      |                                       |     |
|                                      |        | <i>Enterobacteriaceae</i>         | 1,06   |                                       |        | <i>Micrococcaceae</i>                 | 1,1 |                                 |      |                                       |     |
|                                      |        |                                   |        |                                       |        | <i>Gammaproteobacteria</i>            | 1   |                                 |      |                                       |     |
